# Supplementary material for: Effect of Obesity and High-Density Lipoprotein Concentration on the Pathological Characteristics of Alzheimer’s Disease in High-Fat Diet-Fed Mice
Source: MDPI journal article supplement (doi:10.3390/ijms232012296), 2022-10-14

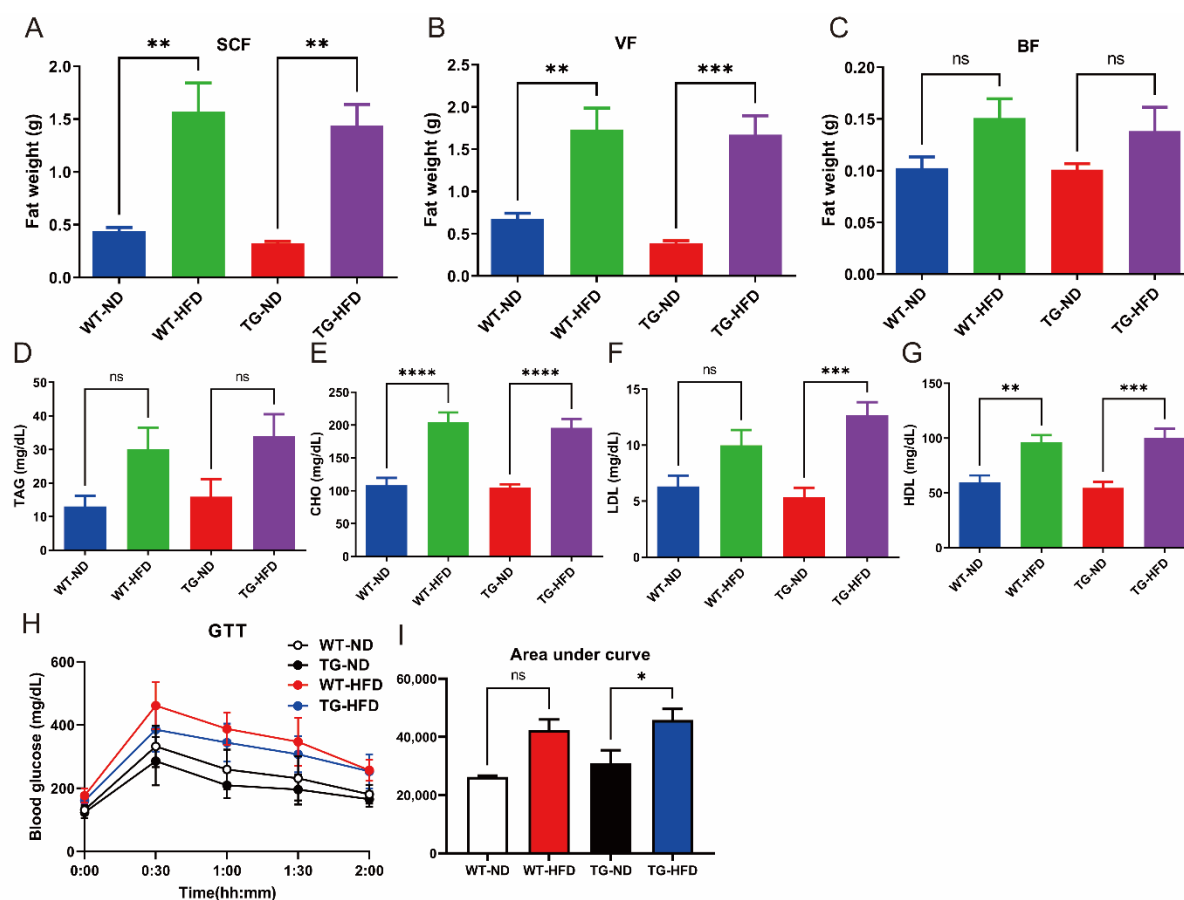

**Supplementary Figure S1.** Analysis of the fat weight (A–C), the blood cholesterol (D–G), and the glucose tolerance test (GTT) (H,I) changes under a high-fat diet (HFD) in the male 5XFAD Alzheimer's disease transgenic mouse model. ns (not significant),  $*p < 0.05$ ,  $**p < 0.01$ ,  $***p < 0.001$ , and  $****p < 0.0001$  (one-way analysis of variance with Tukey post hoc analysis). The number of animals in each group ranged 3–6. Data are presented as the mean  $\pm$  standard error of the mean. ND, normal chow; WT, wildtype; TG, transgenic.

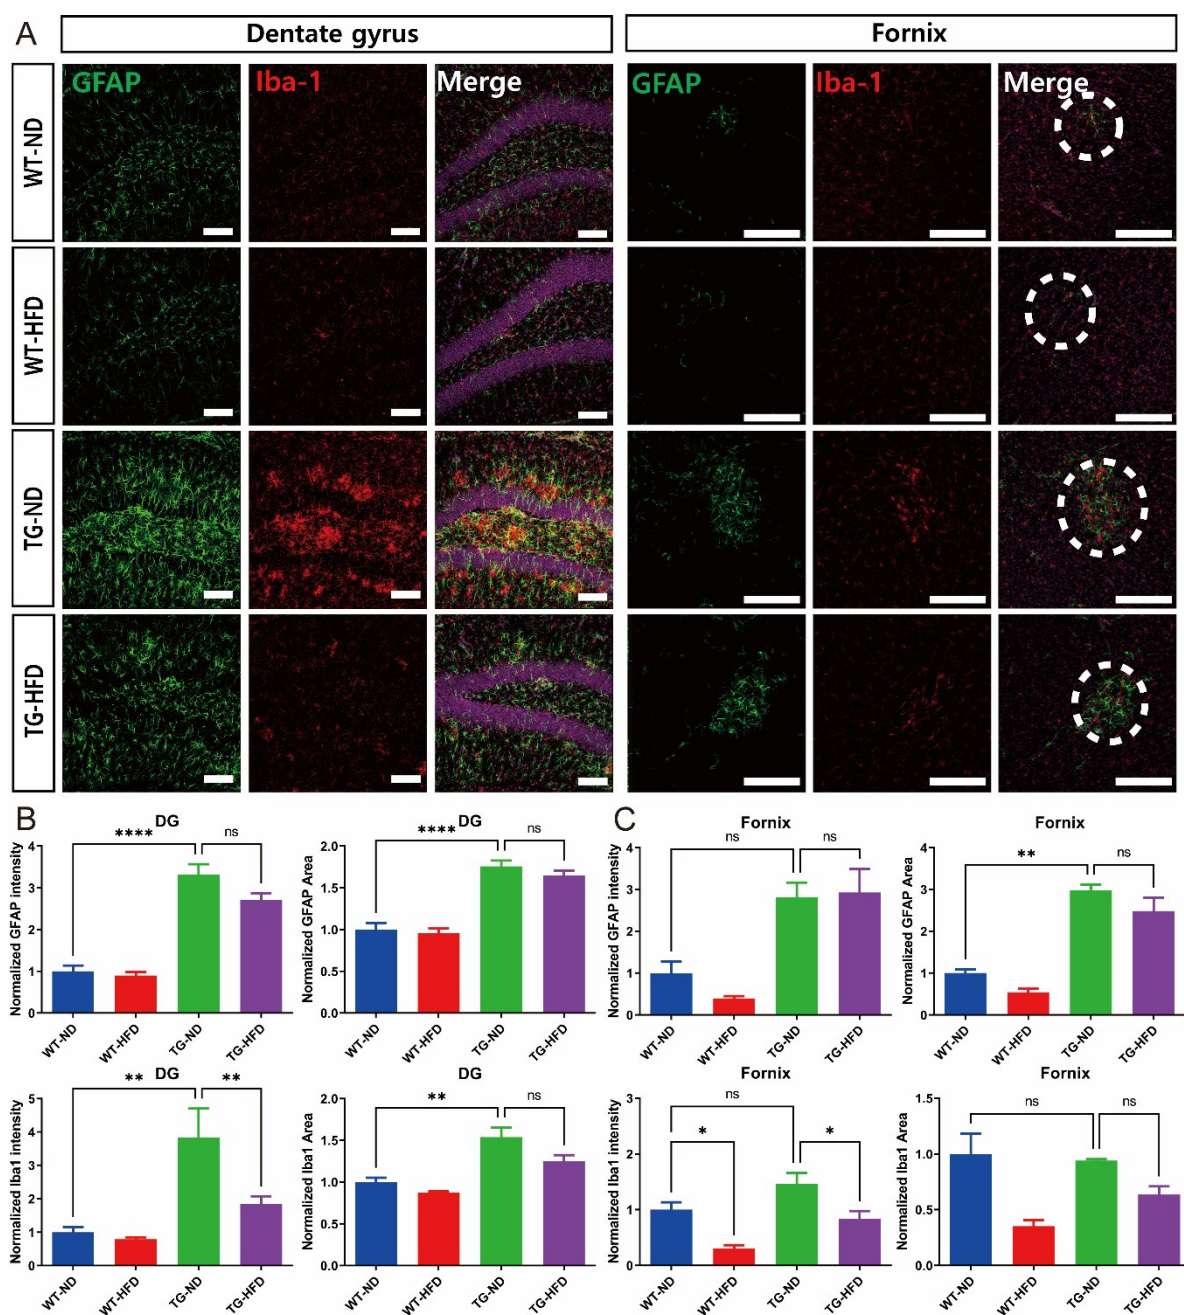

**Supplementary Figure S2.** Analysis of astrocyte and microglia reactivity in the hippocampal dentate gyrus (DG) (A,B) and the hypothalamic fornix region (A,C) under a high-fat diet (HFD). Representative immunofluorescence images of glial fibrillary acidic protein (GFAP) and ionized calcium binding adaptor molecule 1 (Iba1) staining in the male 5XFAD Alzheimer's disease transgenic mouse model. Scale bars = 100  $\mu$ m, ns (not significant), \* $p$  < 0.05, \*\* $p$  < 0.01, and \*\*\*\* $p$  < 0.0001 (one-way analysis of variance with Tukey post hoc analysis). The number of animals in each group ranged 3–8. Data are presented as the mean  $\pm$  standard error of the mean. ND, normal chow; WT, wildtype; TG, transgenic.

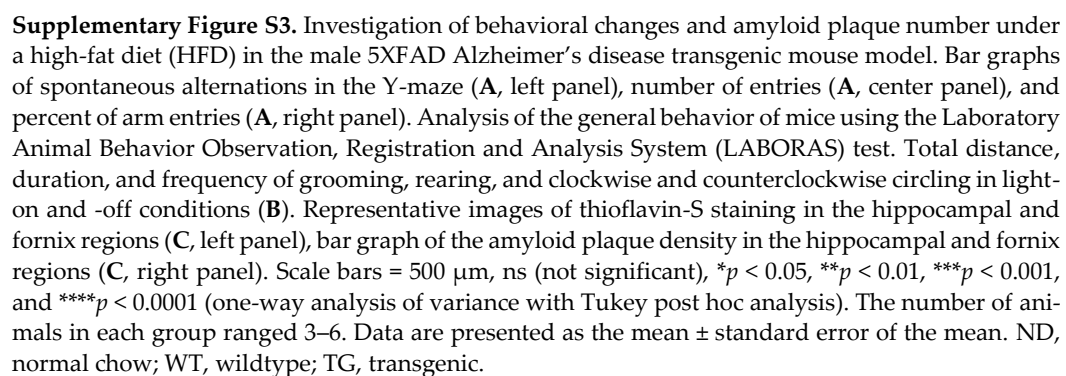

Supplement: s1 [file s1]
